# Supplementary material for: KCNQ1 and Long QT Syndrome in 1/45 Amish: The Road From Identification to Implementation of Culturally Appropriate Precision Medicine
Source: PubMed Central journal article supplement — Circ Genom Precis Med. 2020 Nov 3;13(6):e003133. doi: 10.1161/CIRCGEN.120.003133 (PMC7748050; doi:10.1161/circgen.120.003133), 2020-11-03

## ***KCNQ1* and Long QT Syndrome in 1/45 Amish: The Road from Identification to Implementation of Culturally Appropriate Precision Medicine**

**Running title:** *Streeten et al.; Long QT syndrome due to KCNQ1 founder mutation*

Elizabeth A. Streeten, MD<sup>1,2</sup>; Vincent Y. See, MD, MS<sup>2,4</sup>; Linda B.J. Jeng, MD, PhD<sup>1,2</sup>; Kristin A. Maloney, MS, MGC, CGC<sup>1,2</sup>; Megan Lynch, BS<sup>1,2</sup>; Andrew M. Glazer, PhD<sup>5</sup>; Tao Yang, MD, PhD<sup>5,6</sup>; Dan Roden, MD, PhD<sup>5,6,7</sup>; Toni I. Pollin, MS, CGC, PhD<sup>1,2,4</sup>; Melanie Daue, BS<sup>1,2</sup>; Kathleen A. Ryan, MPH, MS<sup>1,2</sup>; Cristopher Van Hout, PhD<sup>8</sup>; Nehal Gosalia, PhD<sup>8</sup>; Claudia Gonzaga-Jauregui, PhD<sup>8</sup>; Aris Economides, PhD<sup>8</sup>, Regeneron Genetics Center<sup>8</sup>, James A. Perry, PhD<sup>1,2</sup>, Jeffrey O'Connell, PhD<sup>1,2</sup>, Amber Beitelshoes, PharmD, MPH<sup>1,2</sup>, Kathleen Palmer, BSN<sup>1,2</sup>, Braxton D. Mitchell, PhD<sup>1,2,3</sup>, Alan R Shuldiner, MD<sup>8</sup>

<sup>1</sup>Program for Personalized and Genomic Medicine, <sup>2</sup>Department of Medicine, <sup>4</sup>Division of Cardiovascular Medicine, University of Maryland School of Medicine & <sup>3</sup>Baltimore Veterans Administration Medical Center Geriatrics Research and Education Clinical Center, Baltimore, MD; <sup>5</sup>Department of Medicine, Division of Clinical Pharmacology, <sup>6</sup>Department of Pharmacology, <sup>7</sup>Biomedical Informatics, Vanderbilt University Medical Center, Nashville, TN; <sup>8</sup>Regeneron Genetics Center LLC, Tarrytown, NY

### **Correspondence:**

Elizabeth A. Streeten, MD  
University of Maryland School of Medicine  
670 W. Baltimore St, Room 4063  
Baltimore, MD 21201  
Email: [estreete@som.umaryland.edu](mailto:estreete@som.umaryland.edu)

**Journal Subject Terms:** Arrhythmias; Sudden Cardiac Death; Genetic, Association Studies; Clinical Studies; Translational Studies

This article is published in its accepted form; it has not been copyedited and has not appeared in an issue of the journal. Preparation for inclusion in an issue of *Circulation: Genomic and Precision Medicine* involves copyediting, typesetting, proofreading, and author review, which may lead to differences between this accepted version of the manuscript and the final, published version.

**Abstract:**

**Background** - In population-based research exome sequencing (ES), the path from variant discovery to return of results (rROR) is not well established. Variants discovered by research ES have the potential to improve population health.

**Methods** - Population-based ES and agnostic ExWAS were performed 5,521 Amish individuals. Additional phenotyping and *in vitro* studies enabled reclassification of a *KCNQ1* variant from VUS to pathogenic. Results were returned to participants in a community setting.

**Results** - A missense variant was identified in *KCNQ1* (c.671C>T, p.T224M), a gene associated with long QT syndrome (LQTS) type 1 (LQT1), which can cause syncope and sudden cardiac death (SCD). The p.T224M variant, present in 1/45 Amish individuals is rare in the general population (1/248,566 in gnomAD) and was highly associated with QTc on EKG ( $p = 5.53E-24$ ,  $\beta=20.2$  ms/allele). Because of the potential importance of this variant to the health of the population, additional phenotyping was performed in 88 p.T224M carriers and 54 non-carriers.

There was stronger clinical evidence of LQTS in carriers (38.6% vs 5.5%,  $p = 0.0006$ ), greater history of syncope (32% vs 17%,  $p = 0.020$ ), and higher rate of SCD in 1<sup>st</sup> degree relatives < age 30 (4.5% vs 0%,  $p = 0.026$ ). Expression of p.T224M *KCNQ1* in CHO cells showed near complete loss of protein function. Our clinical and functional data enabled reclassification of p.T224M from a variant of unknown significance (VUS) to pathogenic. Of the 88 carriers, 93% met criteria for beta-blocker treatment and 5/88 (5.7%) were on medications that may further prolong QTc. Carriers were provided a CLIA confirmed report, genetic counseling and treatment recommendations. Follow up care was coordinated with local physicians.

**Conclusions** - This work provides a framework by which research ES can be rapidly translated in a culturally appropriate manner to directly benefit research participants and enable population precision health.

**Key words:** long QT syndrome; population genetics; genetics, human; return of results, founder variant, *KCNQ1*

## Introduction

When exome sequencing (ES) is performed in a clinical setting, information that should be returned to the patient is generally clear<sup>1,2</sup>. However, when ES is performed in research settings, as in population-based exome-wide association studies (ExWAS), the issue of return of results to study participants is far less settled. Research return of results (rROR) for actionable findings is not currently obligatory, although increasingly recommended and being performed<sup>3-5</sup>. Many ethical issues have been raised about rROR<sup>4,6</sup>, including the ethical obligations of investigators to return research results to study participants (whether or not this was anticipated in the Informed Consent), whether study participants should have the option to opt out of receiving actionable research findings, and implications to family members who may not be research participants<sup>5,7,8</sup>. Furthermore, there are nontrivial practical and logistical issues and most research grants do not anticipate or provide funding for rROR<sup>9-11</sup>.

Despite these issues, rROR has the potential to positively impact the health of research participants, family members, and the population at large. These benefits may be magnified in founder populations in which pathogenic variants may occur at much higher frequency than in the general population due to genetic drift, the process whereby allele frequencies within a population change by chance over generations. In founder populations with high fecundity, genetic drift can lead to large changes in allele frequencies over a relatively short period of time.

As part of a large ongoing research program in the Old Order Amish (Amish) population from Lancaster County, Pennsylvania, we performed population based ES of 5,521 individuals. ExWAS identified a highly drifted variant in *KCNQ1* (hg38.g.chr11:2571391(C>T); c.671C>T; p.T224M; rs199472706), present in 1 in 45 Amish and significantly associated with increased EKG-derived QTc (QT corrected for heart rate) interval.

*KCNQ1* encodes the potassium voltage-gated channel subfamily Q member 1. Pathogenic mutations in *KCNQ1* cause Long QT Syndrome type 1 (LQT1, MIM #192500), an autosomal dominant disorder that increases the risk for syncope and sudden cardiac death (SCD)<sup>12-14</sup>. In individuals of European descent, the prevalence of LQTS is estimated to be approximately 1:2500, with LQTS1 being the most common cause of this cardiac conduction disorder<sup>15</sup>. *KCNQ1* is included in the ACMG SF v2.0<sup>2</sup> list of medically actionable genes. Known pathogenic (KP) and likely pathogenic (LP) variants are to be reported to patients, when identified through clinical exome or genome sequencing. Beta-blockers are an effective therapeutic intervention in individuals with LQT1 as they may reduce the risk of syncope and sudden death by 70-90%<sup>14</sup>.

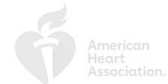

p.T224M *KCNQ1* was reported previously in only 2 patients with LQTS<sup>16,17</sup> and therefore was classified as a variant of unknown significance (VUS) in ClinVar at the start of our study. Since the c.671C>T (p.T224M) variant was highly enriched in the Amish and had a large effect on QTc interval, we performed further clinical phenotyping and *in vitro* functional studies of this variant in order to determine its pathogenicity and better assess its possible health risk to the Amish community. We further describe the model we developed for reclassification of this variant to "Pathogenic" and culturally-appropriate return of results to individuals with the variant, including providing the option for disclosure of results, genetic counseling, recommendations for beta-blocker treatment, and cascade testing of first-degree family members.

## Methods

The authors declare that all supporting data are available within the article and its online supplementary files. The study was approved by the Institutional Review Board of the University

of Maryland School of Medicine. Participants signed written, informed, consent. Because of the sensitive nature of the data collected for this study, requests to access the dataset from qualified researchers trained in human subject confidentiality protocols may be sent to The University of Maryland Program for Personalized and Genomic Medicine, Braxton Mitchell PhD at [bmitchel@som.umaryland.edu](mailto:bmitchel@som.umaryland.edu). Additional information on methods can be found in “Supplemental Materials”.

## Results

### Identification of the c.671C>T (p.T224M) variant in *KCNQ1*

Population agnostic exome sequencing and ExWAS were performed in 5,521 Amish participants from the Amish Complex Disease Research Program (Supplemental Table 1). One of the strongest associations found was for EKG QTc interval with a missense variant in *KCNQ1* (rs199472706; c.671C>T; p.T224M) ( $p = 5.53E-24$ ) (Figure 1A). The p.T224M variant was associated with an average 20.2 ms higher QTc compared to the reference allele (Figure 1C). The p.T224M variant is highly drifted in the Amish, with a frequency of 0.011 (124 carriers among 5,521 individuals); 1 in 45 Amish carry this variant in contrast to the general population in which there is only 1 carrier in 248,566 individuals overall and 1 carrier in 112,482 individuals of European descent from gnomAD (v2.1). As above, an additional p.T224M carrier was reported in the literature<sup>17</sup> but not found in gnomAD. No p.T224M homozygotes were found, consistent with Hardy-Weinberg expectations (only 0.67 homozygotes would have been expected). The p.T224M variant was not associated at genome-wide levels of significance with any other phenotypes present in our database, including cardiovascular risk markers (lipids, coronary calcification, blood pressure, BMI), general chemistry and hematology studies, and DXA bone

density measures. All p.T224M variant carriers were confirmed by Sanger sequencing in the University of Maryland CLIA/CAP-accredited Translational Genomics Laboratory.

As indicated in Figure 1B, the *KCNQ1* locus includes five additional variants showing evidence for association  $p < 5E-08$ , all of which are in moderate linkage disequilibrium (LD) ( $r^2 \geq 0.28$ ) with rs199472706/p.T224M ( $r^2$ : 0.41-0.61). Two of these 5 are predicted missense (1 in *MUC2* and 1 in *KRTAP5-4*). Conditional analyses indicated that the association at this locus was likely due to a single variant since all of these associations were no longer statistically significant after accounting for p.T224M (all  $p > 0.36$ ) (Supplemental Table 2A).

SNPs at three additional loci were identified in our analysis as being significantly or suggestively associated with QTc (Figure 1A). Notably, all three loci have been associated with QT interval previously in the QT Interval-International GWAS Consortium (QT-IGC)<sup>18-20</sup>.

#### **Variable expressivity of p.T224M *KCNQ1* on QTc**

To examine the impact of genetic variation at non-*KCNQ1* loci on expressivity of QTc, we computed a polygenic risk score (PRS) for QTc interval in all study subjects using summary results from two prior GWAS<sup>18,20</sup> and estimated the correlation of QTc interval with PRS. In both *KCNQ1* carriers and non-carriers, increasing PRS correlates with increasing QTc interval. The 39 SNPs contributing to the PRS are shown in Supplemental Table 3. Further analysis revealed no difference in the magnitude of the slopes between the two curves ( $p = 0.36$ ), and thus provided no evidence that the effects of *KCNQ1* p.T224M differ between subjects at low and high polygenic risk for increased QTc (Supplemental Figure 1). We also tested for interactions between four SNPs previously reported to modify the effects of *KCNQ1* Thr244Met on QTc<sup>21-23</sup> and found no evidence for effect modification (Supplemental Table 4).

#### **Clinical characteristics of p.T224M *KCNQ1* carriers**

p.T224M *KCNQ1* was classified as a variant of unknown significance in ClinVar. Because of the strong association of this variant with QTc and that it is one of the ACMG59 actionable variants, we performed additional phenotyping of p.T224M carriers to further assess its pathogenicity and determine its importance to the health of the Amish community. We performed an EKG both supine and within 10 seconds of standing to improve the clinical diagnosis of LQTS<sup>24,25</sup>, a full medical history, and a 3 generation family history. Of the 124 carriers identified, 88 consented to follow-up (Figure 2). Details of the follow-up study protocol are included in the Materials and Methods section. Clinical characteristics are compared between p.T224M carriers and non-carriers in Table 1 and Figure 3. Sex-specific data, stratified by carrier status are shown in Supplemental Table 5. There were slightly more women than men in both carrier and non-carrier groups (Table 1). Mean and maximal QTc values supine and standing are shown in Table 1; maximal values in Figure 3. Mean and maximal QTc increased with standing, as expected in all groups, and both mean and maximal QTc were significantly higher in p.T224M carriers than in non-carriers both lying and standing ( $p < 0.0001$  for all comparisons) (Table 1). In non-carriers, QTc was higher in females than males, as expected (Figure 3). However, in p.T224M carriers, QTc (both maximal and mean) between men and women was not significantly different (Figure 3, Supplemental Table 5). The maximal QTc was abnormal ( $>460$  ms for women,  $>450$  ms for men) in 83% of p.T224M carriers vs 18.5% of non-carriers [ $p < 0.0001$ ; (OR = 19.9; 95% C.I.: 8.41-47.15)] (Table 1). The mean QTc was abnormal in 7% of non-carriers and 54% of carriers ( $p < 0.0001$ ) (Table 1). No individuals had LBBB or intraventricular conduction delay. Three individuals (one carrier, two non-carriers) had high normal to elevated QRS duration (122, 122, 120 ms) in a RBBB pattern while supine. No carriers were deaf, nor were any of their children.

A self-reported personal history of syncope was higher in p.T224M carriers than non-carriers (32% vs 17%,  $p = 0.020$ ) (Table 1). In 13/28 (46%) of p.T224M carriers who had a history of syncope, syncope occurred more than once, including 2 individuals with 10 or more syncopal episodes. Most syncope in non-carriers was vasovagal in character; in carriers, most did not have vasovagal characteristics. In the two carriers with  $\geq 10$  syncopal episodes, some of the episodes had vasovagal qualities. In 4 of the 18 female carriers with a history of syncope, syncope occurred within the first 24 hours postpartum. Most episodes of syncope in p.T224M carriers occurred in childhood or adolescence. The oldest age at first syncopal event was a male carrier at 60 years of age. This individual was on an antidepressant at the time of his syncopal episode that could have been a possible contributor but declined medical evaluation at the time of syncope to assess other causes.

A family history of SCD in 1<sup>st</sup> degree relatives under age 30 years was higher in p.T224M carriers than in non-carriers [4/88 (4.5%) vs 0/137 (0%),  $p = 0.026$ ], but was similar in relatives 30 years of age and over [15/88 (17%) vs 26/137 (20%),  $p = 0.58$ ] (Table 1). The 1<sup>st</sup> degree relatives of p.T224M carriers with SCD under age 30 included 2 crib deaths, a 6 year old boy walking to school, and a 13 year old boy swimming (Figure 4). There were also 3 stillbirths in the families that included carriers of p.T224M. Stillbirths have recently been reported to be increased in LQT carriers<sup>26</sup>. Combining 1<sup>st</sup> and 2<sup>nd</sup> degree relatives of p.T224M carriers, 8% had a family history of sudden death under age 30 years, including 2 additional crib deaths in 2<sup>nd</sup> degree relatives (Figure 4). Through pedigree review, we confirmed that each of these crib deaths was a distinct individual. Although genotyping for p.T224M was not available in the children who suffered sudden death or crib death, four of these children had a parent with the p.T224M variant and the other parents were not genotyped. In p.T224M carriers, we found no association



between the absolute value of the QTc and history of syncope, number of syncopal episodes or family history of SCD at any age. The p.T224M variant itself was associated with these outcomes.

The Schwartz score can be used to make a clinical diagnosis of LQTS, in the absence of a pathogenic genetic variant with criteria including QTc, T wave changes, history of syncope with or without activity, and family history of SCD < 30 years old. A Schwartz score of  $\geq 3.5$  is associated with a high probability of LQTS, 1.5 - 3.0 a moderate probability, and  $\leq 1$  a low probability. The Schwartz score was higher in p.T224M carriers than non-carriers ( $2.5 \pm 1.1$  vs  $0.70 \pm 1.0$ ,  $p < 0.0001$ ). In the absence of a pathogenic variant, a QTc of  $\geq 500$  ms is also considered to be evidence of LQTS. Using the parameters QTc  $\geq 500$  ms and/or Schwartz score of  $\geq 3.5$  as clinical evidence of LQTS, 34/88 (38.6%) of p.T224M carriers vs 3/54 (5.5%) of non-carriers, had clinical evidence of LQTS ( $p = 0.0006$ ) (Table 1).

#### ***In vitro* functional studies of KCNQ1 p.T224M**

*KCNQ1* encodes Kv7.1, a voltage gated potassium channel that is present at the cell surface of cardiac cells. Kv7.1 associates with a function-modifying subunit encoded by *KCNE1* to generate the slowly activating potassium current  $I_{Ks}$  that plays a key role in cardiac repolarization. As shown in Figure 5, *in vitro* expression of the p.T224M channel with *KCNE1* in Chinese hamster ovary (CHO) cells caused loss of  $I_{Ks}$  function compared to wild-type channels<sup>27</sup>. The mutant T224M channel significantly reduced total activating and deactivating currents, with a marked positive shift in the voltage dependence of activation, by  $\sim 26$  mV ( $p < 0.01$ ).

#### **Reclassification of *KCNQ1* p.T224M from a variant of unknown significance to pathogenic**

The p.T224M variant was considered a VUS at initial discovery in our cohort based on ClinVar classification and prior literature. Using the guidelines issued by the ACMG and Association for Molecular Pathology (AMP) to re-classify p.T224M<sup>28</sup> (Supplemental Tables 6 and 7), we determined that there was sufficient evidence to classify the variant as “Pathogenic”. This upgraded classification was submitted to ClinVar to help inform future diagnoses of carriers of this variant elsewhere. Variants in *KCNQ1* exon 4 listed in gnomAD and ClinVar are shown in Supplemental Tables 8 and 9, which show the variation within the transmembrane region of the protein in exon 4, specifically within the S3-S4 linker region. Variants within the region are classified by the sources as pathogenic, likely pathogenic, uncertain significance or not provided; no variation is classified by the sources as likely benign or benign.

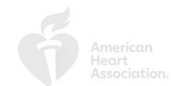

### **Return of results, clinical characterization and treatment recommendations for *KCNQ1***

#### **p.T224M carriers**

Based upon our reclassification of the p.T224M variant in *KCNQ1* as pathogenic and the high prevalence of the variant in the Amish, we developed a plan to offer return of results to p.T224M carriers. The plan was reviewed with the University of Maryland Amish Research Clinic Advisory Committee, which includes Amish community leaders, and was approved by the University of Maryland Institutional Review Board. The plan is described in greater detail in the Materials and Methods section.

As shown in Figure 2, 83% (103/124) of p.T224M carriers who received a letter to inquire about their interest in obtaining additional information responded. Of these, 86% (88/103) expressed interest in obtaining additional information and 15/103 did not. Of those who declined, none provided a specific reason for declining participation. Home visit 1, which included repeat EKG (supine and standing), medical and family histories, and a blood draw for

CLIA confirmation of genotype was completed on all 88 participants who were enrolled in the study. Home visit 2, in which genetic results were disclosed and clinical recommendations were provided, was completed in 83 (5 participants did not call to schedule the second visit but received result letters by mail; see below). During home visit 2, many participants indicated their appreciation for the follow up and information and expressed interest in cascade testing in their children. No participant asked to be withdrawn from the study.

Within one week of home visit 2, a “final letter” and “doctor letter” were mailed to p.T224M carriers. These letters reviewed in detail what was discussed at the visit, including genetic counseling and treatment recommendations. The “doctor letter” recommended using nadolol for all except women of child bearing age, in whom propranolol was recommended since nadolol is contraindicated in breastfeeding<sup>29</sup>. Of 88 carriers, 80 (93%) qualified for beta-blocker treatment (Figure 2). Twenty-two (25%) of carriers were on prescription medications, including 5 (5.7%) who were on medications known to prolong QTc according to *crediblemeds.com*. In the “doctor letter” for these individuals, the recommendation was made to change to a medication not known to prolong QTc if possible, and a list of medications known to prolong QTc was included with recommendations to avoid these medications when possible.

## Discussion

We describe the path from discovery of a variant in *KCNQ1* in population research ES to its classification as pathogenic, clinical confirmation, and culturally sensitive return of results to Amish participants, including genetic counseling and treatment recommendations coordinated with local primary care providers, and opportunity for cascade testing of family members. The c.671C>T (p.T224M) variant in *KCNQ1* was previously reported in only two individuals with

LQTS<sup>16,17</sup> and considered to be a VUS. The variant is highly enriched in the Amish (carrier frequency 1/45), likely through a founder effect and genetic drift. Our phenotyping showed that p.T224M carriers had a 20.2 ms higher QTc, a higher rate of syncope, a higher number of SCD in 1<sup>st</sup> degree family members under age 30 years, and a higher Schwartz score than non-carriers. These data, in addition to *in silico* predictions (Supplemental Table 6), location of the variant in an important functional domain with minimal benign variation<sup>23</sup>, extremely low frequency in gnomAD, and *in vitro* functional studies showing variant significantly reduced activating and deactivating current densities and caused a markedly positive shift of voltage dependence of the channel activation by ~26 mV compared to wild-type KCNQ1, enabled us to reclassify the c.671C>T (p.T224M) variant as “Pathogenic” according to ACMG guidelines. To our knowledge, our work is the first electrophysiologic evidence showing that p.T224M causes a loss of the KCNQ1 channel function.

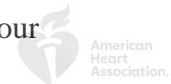

Of critical clinical importance to the Amish population is to understand the absolute risk for SCD in p.T224M carriers. Unfortunately, we were unable to quantitatively estimate the risk of SCD in the Amish based on our data. The degree of lengthening of QTc in carriers was not associated with syncope or family history of SCD, so we presume all carriers of the p.T224M variant to be at increased risk, including the 46% of p.T224M carriers with a normal mean QTc. SCD in 1<sup>st</sup> degree family members of p.T224M carriers was more common than in non-carriers only among young relatives (<30 years). In addition, in carriers most syncopal episodes occurred during childhood and adolescence. These data suggest that the highest risk of syncope and SCD of this variant may be in childhood. However, we have insufficient data to conclude that SCD risk attributable to p.T224M decreases or is modified with age. The similar rates of SCD in first

degree relatives of carriers vs. non-carriers age >30 years may reflect SCD risk increasing with age in the general population due to other etiologies, such as ischemic heart disease.

An unresolved issue in the field is what determines the variable expressivity that is commonly seen LQT1. Our analyses indicated that polygenic background influences QTc interval in carriers as it does in non-carriers, although we found no evidence for a larger effect of p.T224M on QT interval in those with a stronger polygenic background. Nor did we observe any statistical evidence of modifying effects of common variants in other genes previously reported to modify the effects of other pathogenic *KCNQ1* variants on QT interval. However, as in other studies, power to detect modifier effects in our study was limited.



Numerous medications are known to prolong QTc. In our cohort, 5 of 88 p.T224M carriers (5.7%) were on a medication known to prolong QT. This was brought to the attention of these individuals and their physicians, with recommendations for the physicians to change to a safer medication, if possible. Furthermore, all p.T224M carriers, even those with normal QTc, who could have only been identified through genetic testing, would be well-advised to avoid drugs that prolong QT interval. This is an example of the benefit of genomic information on medication safety in individuals carrying at risk genotypes, “precision medicine”<sup>30</sup>.

In addition, we found that 7% of non-carriers had a higher mean QTc (and 19.6% had a higher maximal QTc) than normal. However, only three non-carriers with greater than normal QTc had strong clinical evidence for LQTS (Schwartz score  $\geq 3.5$  or QTc  $\geq 500$  ms). For these three individuals, recommendations were made to consult with a cardiologist for further evaluation.

Overlap of QTc interval between normal individuals and those with LQTS has been well described<sup>31</sup>. Since the goal of this study was to compare carriers of the *KCNQ1* p.T224M variant to non-carriers, a normal QTc was not required for inclusion in the non-carrier group. In non-carriers of p.T224M with a longer than normal QTc, none was on a medication known to prolong QTc, nor were there any obvious other causes to explain the longer than normal QTc in these individuals.

Our additional phenotyping revealed some other interesting findings, including that supine QTc was no different in p.T224M variant carrier women and men, whereas in non-carriers, the expected higher QTc in women was observed. The number of men and women with a history of syncope in our study was similar. Others have reported that women with a pathogenic *KCNQ1* variant have a higher QTc than men<sup>23,32</sup>.

Founder pathogenic variants in *KCNQ1* causing LQT1 have been described in other populations, including the Bitxsan First Nations population in Canada (c.613G>A, p.V205M), present in 1:125<sup>23</sup> with a QTc effect size of 31 ms per allele. Founder pathogenic *KCNQ1* variants have also been reported in the Finnish (c.1766G>A, p.G589D) present in 1:250 with an effect size of 50 ms<sup>33</sup> and in the Swedish (c.1552C>T, p.A518X and c.332A>G, p.T111C), with effect sizes 50 and 30 ms, respectively<sup>34</sup>. The founder variant in Afrikaners (c.641C>T, p.A341V) is associated with a SCD death rate of 14% before age 20 years<sup>35</sup>. In the Saudi Arabian founder mutation (c.387-5T>A) there was a high incidence of homozygotes likely due to endogamy<sup>36</sup>. The p.T224M variant in the Amish has a higher prevalence (1/45) than these other founder variants, with a smaller effect size on QTc (20.2 ms/allele) and possibly lower morbidity. To date,

we have not found any p.T224M homozygotes but speculate that some of the stillbirths reported to us could have been homozygotes. In all examples of pathogenic founder variants in *KCNQ1*, the impact on survival or reproduction is likely minimal; otherwise, with time the variants would become progressively less prevalent. Recently, a multiexon duplication in *RYR2* has been reported in two large Amish families with a high risk of sudden death<sup>37</sup>. In our database of Pennsylvania Amish, we found 8 heterozygotes for this duplication and no homozygotes.

Currently, we have little information on how many *KCNQ1* p.T224M carriers elected to be treated with a beta-blocker or how many family members will seek genetic testing. We know that currently, among the 88 participants, only two family members have undergone *KCNQ1* genetic testing. Since the Amish do not own cars, we suspect that inconvenience and cost of transportation to a physician's office or laboratory to obtain testing and the cost of testing may be major barriers to cascade testing in this population. We speculate that if this testing were offered at low cost or free of charge and without the need to travel, cascade testing for the p.T224M variant in the Amish might be more commonly done. A study is currently underway to attempt to answer these questions and to offer free in-home testing to offspring of probands with the p.T224M variant. Moreover, given its high prevalence in the Amish, adding this pathogenic variant to newborn screening in states with a significant Amish population may be indicated and a more effective approach to identifying at risk individuals at the population level.

Limitations of this study include the absence of *KCNQ1* genotyping and autopsy reports on family members who had SCD to confirm that they were carriers of the p.T224M variant.

Secondly, we may have had fewer p.T224M carriers with a normal mean QTc if we had included stress testing in addition to the immediate standing EKG. In addition, we included 83 non-carriers who were not in the primary study population, to increase our power to assess for difference in family history of SD between carriers and non-carriers. Strengths of the study include that all carriers were seen by one physician, that family history in carriers were obtained by a medical geneticist, and that all EKGs were read by an electrophysiologist.

Through ExWAS, we describe the identification of a highly drifted missense variant, p.T224M, in *KCNQ1* in the Amish that is highly associated with QTc. Additional phenotyping and functional characterization led to reclassification of the c.671C>T (p.T224M) variant in *KCNQ1* as pathogenic for LQT1. We implemented a culturally appropriate program for return of results including recommendations for cascade testing and treatment, coordinated with local health care providers. Furthermore, we have adopted a protocol for *KCNQ1* genotyping and return of results for all ongoing studies at the Amish Research Clinic. This work provides an example of clinical implementation of an actionable genetic research result that has important health implications not only for research participants but also for community health in a founder population in which this pathogenic variant is common. We suggest this approach can be adapted for use in other genetic studies, particularly those whose protocol and consent did not anticipate return of medically actionable secondary findings.

**Disclaimer:** This scientific journal article was prepared or accomplished by Linda Jeng in her personal capacity. The opinions expressed in this article are the author's own and do not reflect the view of the US Food and Drug Administration, the Department of Health and Human Services, or the United States government



**Sources of Funding:** NIH grants U01 HL072515, U01 HL137181, R01 AG18728, R01 HL076768, U01 GM074518, R21 HG010412, R01 HL088119, GM115305 and AHA grant 16MCPRP31350041. Partial support for this study, including exome sequencing was provided by the Regeneron Genetics Center, LLC.

**Disclosures:** Drs. Shuldiner, Van Hout, Gosalia, Gonzaga-Jauregu and Economides are employees of Regeneron Pharmaceuticals, Inc. and receive compensation for their employment. Details are present in Supplemental Materials.

### References:

1. Green RC, Berg JS, Grody WW, Kalia SS, Korf BR, Martin CL, McGuier AL, Nussbaum RL, O'Daniel JM, Ormond KE, et al. ACMG Recommendations for Reporting of Incidental Findings in Clinical Exome and Genome Sequencing. *Genet Med*. 2013;15:565-74.
2. Kalia SS, Adelman K, Bale SJ, Chung WK, Eng C, Evans JP, Herman GE, Hufnagel SB, Klein TE, Korf BR, et al. Recommendations for reporting of secondary findings in clinical exome and genome sequencing, 2016 update (ACMG SF v2.0): A policy statement of the American College of Medical Genetics and Genomics. *Genet Med*. 2017;19:249-255.
3. Dewey FE, Murray MF, Overton JD, Habegger L, Leader JB, Fetterolf SN, O'Dushlaine C, Van Hout CV, Staples J, Gonzaga-Jauregui C, et al. Distribution and clinical impact of functional variants in 50,726 whole-exome sequences from the DiscovEHR study. *Science*. 2016;354:aaf6814.
4. Fabsitz RR, McGuire A, Sharp RR, Puggal M, Beskow LM, Biesecker LG, Bookman E, Burke W, Burchard EG, Church G, et al. Ethical and Practical Guidelines for Reporting Genetic Research Results to Study Participants: updated guidelines from a National Heart, Lung and Blood Institute working group. *Circ Cardiovasc Genet*. 2010;3:574-80.
5. Bombard Y, Brothers KB, Fitzgerald-butts S, Garrison NA, Jamal L, James CA, Jarvik GP, McCormick JB, Nelson TN, Ormond KE, et al. The Responsibility to Recontact Research Participants after Reinterpretation of Genetic and Genomic Research Results. *Am J Hum Genet*. 2019;104:578-595.
6. Kollek R, Petersen I. Disclosure of individual research results in clinico-genomic trials: challenges, classification and criteria for decision-making. *J Med Ethics*. 2011;37:271-5.
7. Bui ET, Anderson NK, Kassem L, McMahan FJ. Do Participants in Genome Sequencing Studies of Psychiatric Disorders Wish to Be Informed of Their Results? A Survey Study. *PLoS One*. 2014;9:e101111.

8. Miller FA, Hayeems RZ, Li L, Bytautas JP. One thing leads to another: the cascade of obligations when researchers report genetic research results to study participants. *Eur J Hum Genet.* 2012;20:837–43.
9. Fossey R, Kochan D, Winkler E, Pacyna JE, Olson J, Thibodeau S, Connolly JJ, Harr M, Behr MA, Prows CA, et al. Ethical considerations related to return of results from genomic medicine projects: The eMERGE network (phase III) experience. *J Pers Med.* 2018;8:2.
10. Kostick KM, Brannan C, Pereira S, Lázaro-Muñoz G. Psychiatric genetics researchers' views on offering return of results to individual participants. *Am J Med Genet B Neuropsychiatr Genet.* 2019;180:589-600.
11. Schwartz MLB, McCormick CZ, Lazzeri AL, Lindbuchler DM, Hallquist MLG, Manickam K, Buchanan AH, Rahm AK, Giovanni MA, Frisbie L, et al. A Model for Genome-First Care: Returning Secondary Genomic Findings to Participants and Their Healthcare Providers in a Large Research Cohort. *Am J Hum Genet.* 2018;103:328–37.
12. Phillips J, Ichinose H. Clinical and pathologic studies in the hereditary syndrome of a long QT interval, syncopal spells and sudden death. *Chest.* 1970;58:236-43.
13. Waddell-Smith KE, Skinner JR, members of the CSANZ Genetics Council Writing Group. Update on the Diagnosis and Management of Familial Long QT Syndrome. *Heart Lung Circ.* 2016;25:769–76.
14. Schwartz, PJ., Ackerman MJ, George AL Jr WA, Wilde AAM. Impact of Genetics on the Clinical Management of Channelopathies. *Am Coll Cardiol.* 2013;62:169–80.
15. Schwartz PJ, Stramba-Badiale M, Crotti L, Pedrazzini M, Besana A, Bosi G, Gabbarini F, Goulene K, Insolia R, Mannario S, et al. Prevalence of the Congenital Long-QT Syndrome. *Circulation.* 2009;120:1761–7.
16. Kapplinger JD, Tester DJ, Salisbury BA, Carr JL, Harris-Kerr C, Pollevick GD, Wilde AA, Ackerman MJ. Spectrum and prevalence of mutations from the first 2,500 consecutive unrelated patients referred for the FAMILION long QT syndrome genetic test. *Heart Rhythm.* 2009;6:1297–303.
17. Schwartz PJ, Stramba-Badiale M, Crotti L, Pedrazzini M, Besana A, Bosi G, Gabbarini F, Goulene K, Insola R, Mannarino S, et al. Prevalence of the congenital Long-QT syndrome. *Circulation.* 2009;3:1761-7.
18. Arking DE, Pulit SL, Crotti L, van der Harst P, Munroe PB, Koopmann TT, Sotoodehnia N, Rossin EJ, Morley M, Wang X, et al. Genetic association study of QT interval highlights role for calcium signaling pathways in myocardial repolarization. *Nat Genet.* 2014;46:826-36.

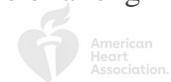

19. Bihlmeyer NA, Brody JA, Smith AV, Warren HR, Lin H, Isaacs A, Liu C-T, Marten J, Radmanesh F, Hall LM, et al. ExomeChip-Wide Analysis of 95 626 Individuals Identifies 10 Novel Loci Associated With QT and JT Intervals *Circ Genom Precis Med*. 2018;11:e001758.
20. van Setten J, Verweij N, Mbarek H, Niemeijer MN, Trompet S, Arking DE, Brody JA, Gandi I, Grarup N, Hall LM, et al. Genome-wide association meta-analysis of 30 , 000 samples identifies seven novel loci for quantitative ECG traits. *Eur J Hum Genet*. 2019;27:952–62.
21. de Villiers CP, van de Merwe L, Crotti L, Goosen A, George AL, Schwartz PJ, Brink PA, Moolman-Smook JC, Corfield VA. AKAP9 is a genetic modifier of congenital long QT syndrome type 1. *Circ Cardiovasc Genet*. 2014;7:599–606.
22. Post W, Shen H, Damcott C, Arking DE, Kao WH, Sack PA, Ryan KA, Chakravarti A, Mitchell BD, Shuldiner AR. Associations between genetic variants in the NOS1AP (CAPON) gene and cardiac repolarization in the Old Order Amish. *Hum Hered*. 2007;64:214-9.
23. Kapplinger JD, Erickson A, Asuri S, Tester DJ, McIntosh S, Kerr CR, Morrison J, Tang A, Sanatani S, Arbour L, et al. KCNQ1 p.L353L affects splicing and modifies the phenotype in a founder population with long QT syndrome type 1. *J Med Genet*. 2017;54:390–398.
24. Chorin E, Havakuk O, Adler A, Steinvil A, Rozovski U, van der Werf C, Postema PG, Topaz G, Wilde AA, Viskin S, et al. Diagnostic value of T-wave morphology changes during “ QT stretching ” in patients with long QT syndrome. *Heart Rhythm*. 2015;12:2263–71.
25. Viskin S, Postema PG, Bhuiyan ZA, Rosso, Kalman JM, Vohra JK, Guevara-Valdivia, Marquez MF, Kogan E, Belhassen B, et al. The Response of the QT Interval to the Brief Tachycardia Provoked by Standing A Bedside Test for Diagnosing Long QT Syndrome. *J Am Coll Card*. 2010;55:1955-61.
26. Cuneo BF, Kaizer AM, Clur SA, Swan H, Herberg U, Winbo A, Rydberg A, Haugaa K, Etheridge S, Ackerman MJ, et al. Fetal LQTS Consortium. Mothers With Long QT Syndrome Are at Increased Risk for Fetal Death: Findings From a Multicenter International Study. *Am J Obstet Gynecol*. 2020;222:263.e1-263.e11.
27. Yang T, Chung SK, Zhang W, Mullins JGL, McCulley CH, Crawford J, MacCormick J, Eddy CA, Shelling AN, French JK, et al. Biophysical properties of 9 KCNQ1 mutations associated with long-QT syndrome. *Circ Arrhythmia Electrophysiol*. 2009;2:417–26.
28. Richards LS, Aziz NP, Bale S, Bick D, Das S, Gastier-Foster J, Grody WW, Hegde M, Lyon E, Spector E, et al. Standards and Guidelines for the Interpretation of Sequence Variants: A Joint Consensus Recommendation of the American College of Medical Genetics and Genomics and the Association for Molecular Pathology. *Genet Med*. 2015;17:405–24.
29. Devanzo, R, Bua J, Paloni G, Facchina G. Breastfeeding and migraine drugs. *Eur J Clin Pharmacol*. 2014;70:1313-24.

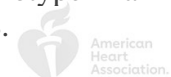

30. Ginsburg GS, Phillips KA. Precision medicine: From science to value. *Health Aff (Millwood)*. 2018;37:694–701.
31. Viskin S. The QT interval: Too long, too short or just right. *Heart Rhythm*. 2009;6:711-5.
32. Winbo A, Stattin EL, Westin IM, Norberg A, Persson J, Jensen SM, Rydberg A. Sex is a moderator of the association between NOS1AP sequence variants and QTc in two long QT syndrome founder populations: A pedigree-based measured genotype association analysis. *BMC Med Genet*. 2017;18:74.
33. Marjamaa A, Salomaa V, Newton-Cheh C, Porthan K, Reunanen A, Karanko H, Jula A, Lahermo P, Vaananen H, Toivonen L, et al. High prevalence of four long QT syndrome founder mutations in the Finnish population. *Ann Med*. 2009;41:234–40.
34. Stattin E-L, Boström IM, Winbo A, Cederquist K, Jonasson J, Jonsson BA, Diamant UB, Jensen SM, Rydberg A, Norberg A. Founder mutations characterise the mutation panorama in 200 Swedish index cases referred for Long QT syndrome genetic testing. *BMC Cardiovasc Disord*. 2012;12:95.
35. Brink PA, Crotti L, Corfield V, Goosen A, Durrheim G, Hedley P, Heradien M, Geldenhuys G, Vanoli E, Bacchini S, et al. Phenotypic variability and unusual clinical severity of congenital long-QT syndrome in a founder population. *Circulation*. 2005;112:2602–10.
36. Bdier AY, Al-ghamdi S, Verma PK, Dagriri K, Alshehri B, Jiman OA, Ahmed SE, Wilde AAM, Bhuiyan ZA, Al-Aama JY. Autosomal recessive long QT syndrome , type 1 in eight families from Saudi Arabia. *Mol Genet Genomic Med*. 2017;5:592–601.
37. Tester DJ, Bombei HM, Fitzgerald KK, Giudicessi JR, Pitel BA, Thorland EC, Russell BG, Hamrick SK, Kim CSJ, Haglund-Turnquist CM, et al. Identification of a novel homozygous multi- exon duplication in RYR2 among children with exertion-related unexplained sudden deaths in the Amish community. *JAMA Cardiol*. 2020;5:13-18.

**Table 1.** Characteristics of *KCNQ1* p.T224M carriers compared to non-carriers.

|                                                                     | <i>KCNQ1</i><br>variant<br>Carriers | Non-carriers    | p-value | p-value<br>age/sex<br>adjusted |
|---------------------------------------------------------------------|-------------------------------------|-----------------|---------|--------------------------------|
| N                                                                   | 88                                  | 54              |         |                                |
| % Female                                                            | 56                                  | 53              |         |                                |
| Age, years $\pm$ SD                                                 | 46.4 $\pm$ 17.0                     | 53.4 $\pm$ 15.9 | 0.0023  | -                              |
| Mean QTc                                                            |                                     |                 |         |                                |
| Normal supine*, n/total (%)                                         | 40/88 (46)                          | 50/54 (92.6)    |         |                                |
| Supine $\pm$ SD, ms                                                 | 460 $\pm$ 29                        | 422 $\pm$ 23    | <0.0001 | <0.0001                        |
| Standing $\pm$ SD, ms                                               | 483 $\pm$ 40                        | 435 $\pm$ 26    | <0.0001 | <0.0001                        |
| Max QTc                                                             |                                     |                 |         |                                |
| Normal supine*, n/total (%)                                         | 17/88 (17)                          | 44/54 (81.5)    |         |                                |
| Supine $\pm$ SD, ms                                                 | 480 $\pm$ 32                        | 435 $\pm$ 26    | <0.0001 | <0.0001                        |
| Standing $\pm$ SD, ms                                               | 502 $\pm$ 43                        | 453 $\pm$ 33    | <0.0001 | <0.0001                        |
| Schwartz score $\geq$ 3.5 and/or<br>QTc $\geq$ 500 ms, n (%)        | 34 (38.6)                           | 3 (5.5)         | 0.0006  | -                              |
| History of syncope <sup>†</sup> , n (%)                             | 29 (32)                             | 26 (17)         | 0.032   | 0.020                          |
| FH of sudden death in 1 <sup>st</sup> degree relatives <sup>‡</sup> |                                     |                 |         |                                |
| All, n (%)                                                          | 15 (17)                             | 26 (20)         | 0.58    | -                              |
| Under age 30 ears, n (%)                                            | 4 (4.5)                             | 0 (0)           | 0.026   |                                |

\* Normal for males < 450 milliseconds (ms) and for females <460 ms; SD = standard deviation.

<sup>†</sup> N for non-carriers for this phenotype was 137, including the 54 non-carriers with QTc measured by cardiologist plus 83 additional non-carriers from our database who had the question about syncope and family history (FH) of unexplained sudden death but did not have QTc measured by cardiologist.

<sup>‡</sup> Means and standard deviations obtained by t-tests and chi-square tests.

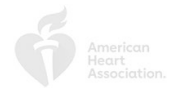

# Circulation: Genomic and Precision Medicine

---

**Figure Legends:**

**Figure 1.** Exome wide analysis of QTc in 5,521 Amish subjects. Panel A. Manhattan plot, Q-Q plot (insert). The red dotted line represents the threshold for genomewide significance ( $p < 5E-08$ ) and the blue dotted line represents a threshold of  $p < 1E-06$ . Panel B. LocusZoom plot of *KCNQ1* region on chromosome 11 showing all variants with  $p$ -value  $< 5E-08$ , for our study population. Peak association at p.T224M (rs199472706): Age and sex adjusted  $\beta=20.2$  msec;  $p=5.53E-24$ . The red dotted line represents the threshold for genomewide significance ( $p < 5E-8$ ) and the LD values are computed from the Amish. Recombination rate data are obtained from HapMap and may not necessarily pertain to the Amish. Panel C. Boxplot comparing unadjusted mean QTc between *KCNQ1* p.T224M carriers (CT) vs non-carriers (CC).

**Figure 2.** Recontact, clinical follow-up and return of results for p.T224M *KCNQ1* carriers. Of the 124 carriers offered return of results, 88 (71% of those who received initial letter, 86% of those who responded) were enrolled. All 88 participants received their results with individualized clinical recommendations.

**Figure 3.** Higher maximal QTc in *KCNQ1* p.T224M variant carriers (black bars) vs non-carriers (white bars). Group, QTc max  $\pm$  SD and N are shown below bars. C = p.T224M carrier; NC = non-carrier of p.T224M. TOTAL = men and women. The normal QTc for men is  $<450$  ms; for women  $<460$  ms. P-values for comparisons: \*  $<0.0001$ , \*\* 0.34, \*\*\* 0.0005.

**Figure 4.** Family history of unexplained sudden deaths in children, crib deaths and stillborns in the families of carriers of the *KCNQ1* p.T224M variant. None of the children who died were genotyped for this variant and none was known to be deaf.

**Figure 5.** *KCNQ1* T224M loss of  $I_{Ks}$  function. Panels A and B show  $I_{Ks}$  recorded in Chinese hamster ovary (CHO) cells in which wild-type (WT) *KCNQ1* or T224M were co-expressed with *KCNE1* (the  $I_{Ks}$  accessory subunit). Panels C and D summarize activating and deactivating  $I_{Ks}$  in the two groups of cells. The mutant T224M channel had significantly reduced total activating and deactivating currents, with a marked positive shift in the voltage dependence of activation, by ~26 mV ( $p < 0.01$ ). Current densities were expressed in pA/pF after normalization of current amplitude to cell capacitance. The voltage clamp protocol is shown in the inset.

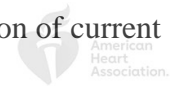

## Circulation: Genomic and Precision Medicine

---



A

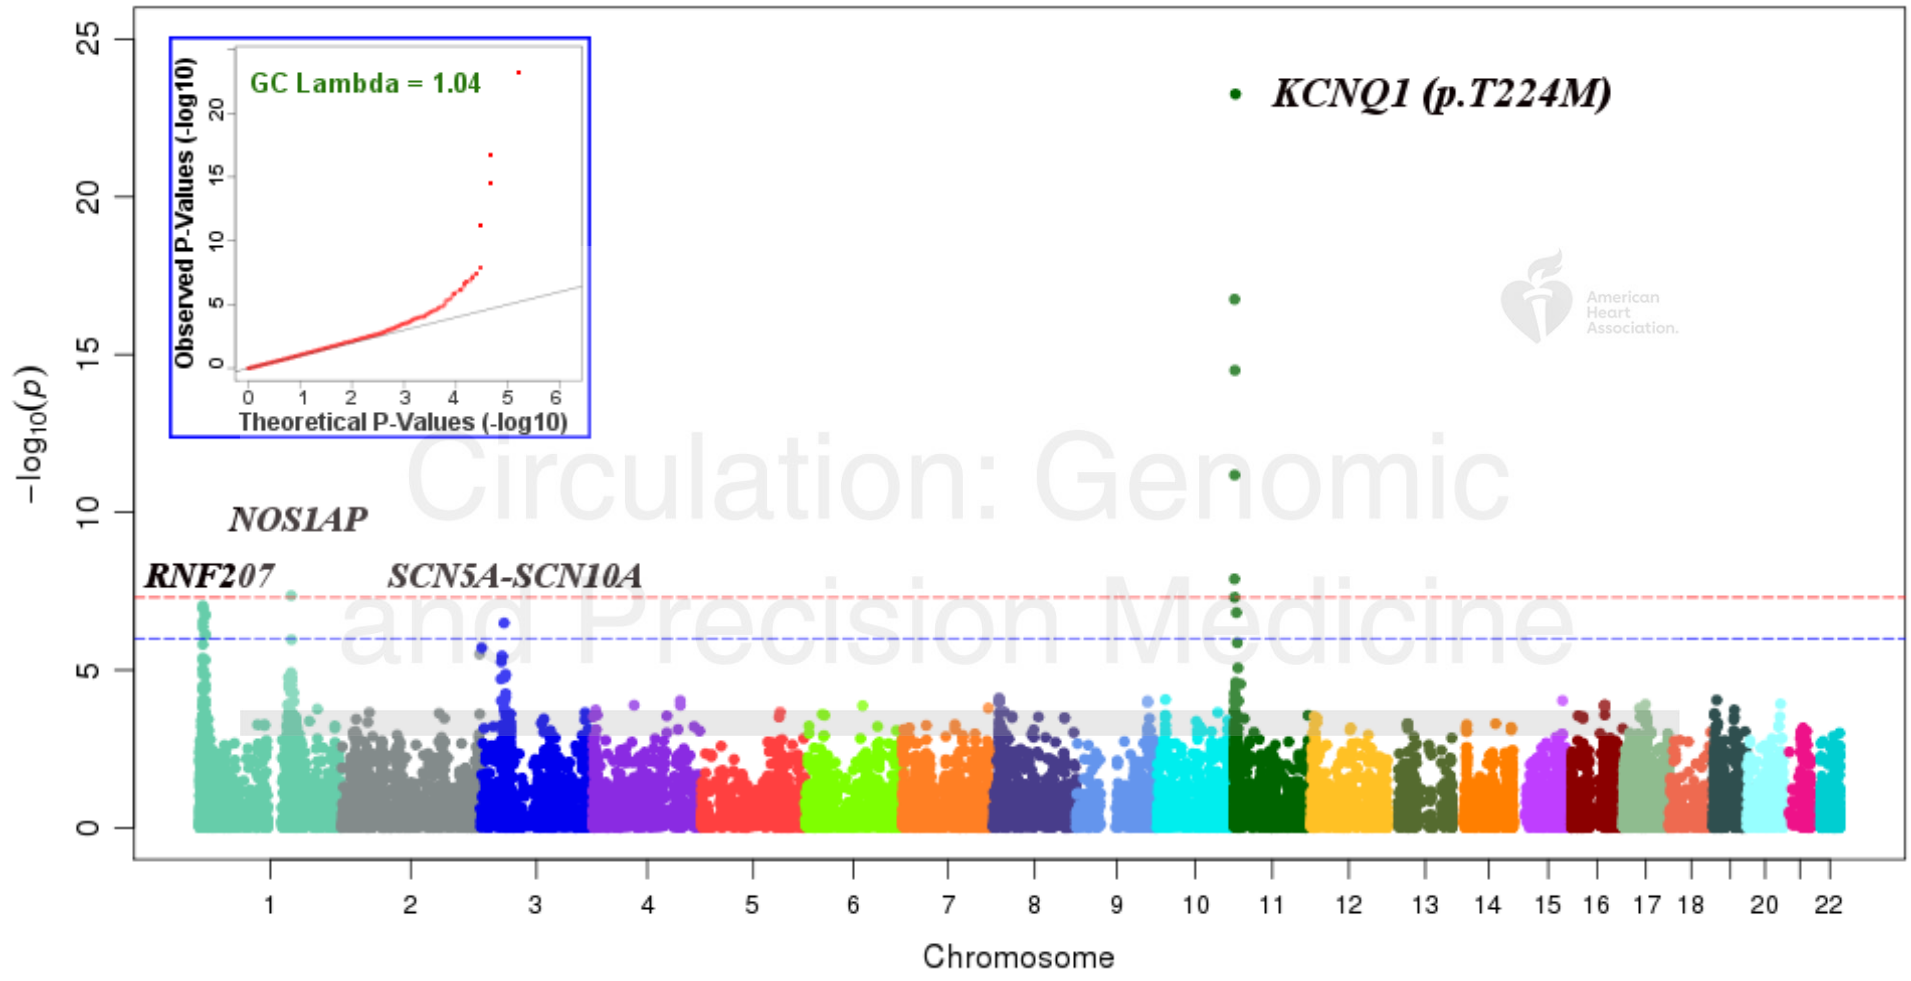

**B**

### QTcInterval\_SELECT on Chr11 .. [RegnES3, N:5521] ..

TopVar: rs199472706 chr11:2592621\_b37 .. KCNQ1 [T224M] .. [SELECT] [A.S.GRM.5521]

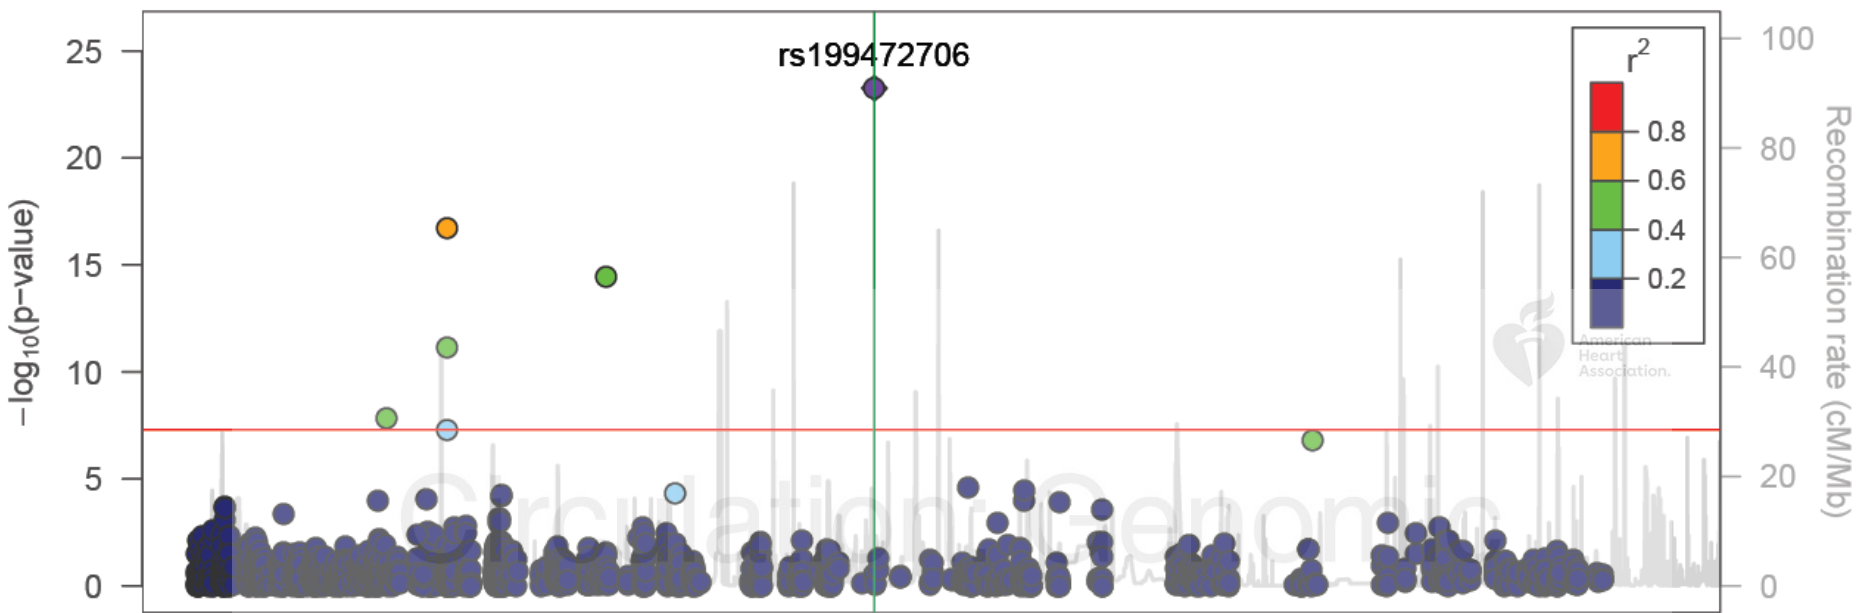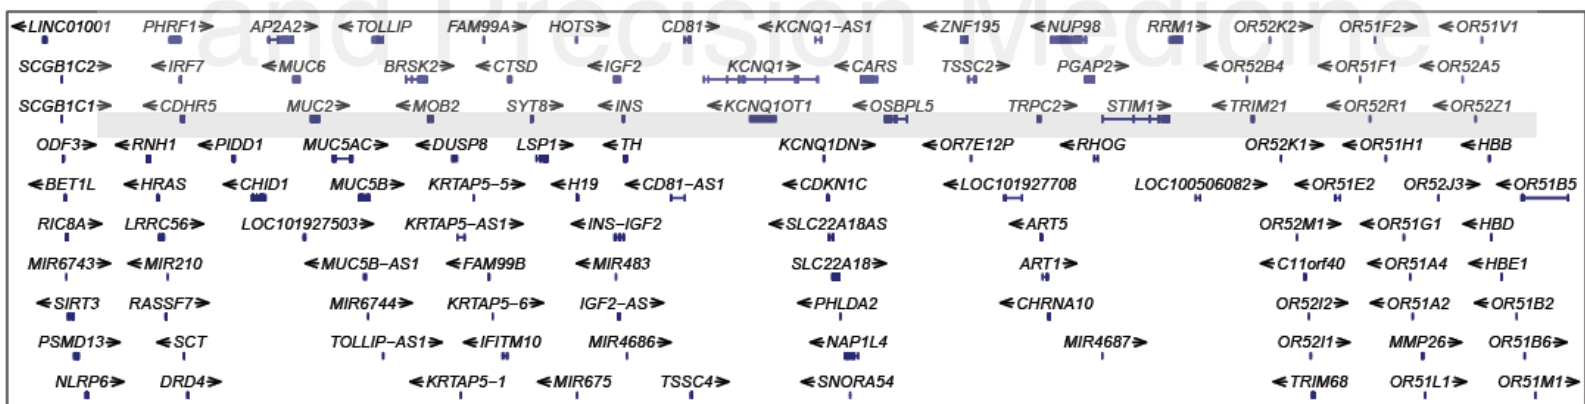

73 genes omitted

0 1 2 3 4 5

Position on chr11 (Mb)

C

QTc Distribution by Genotype

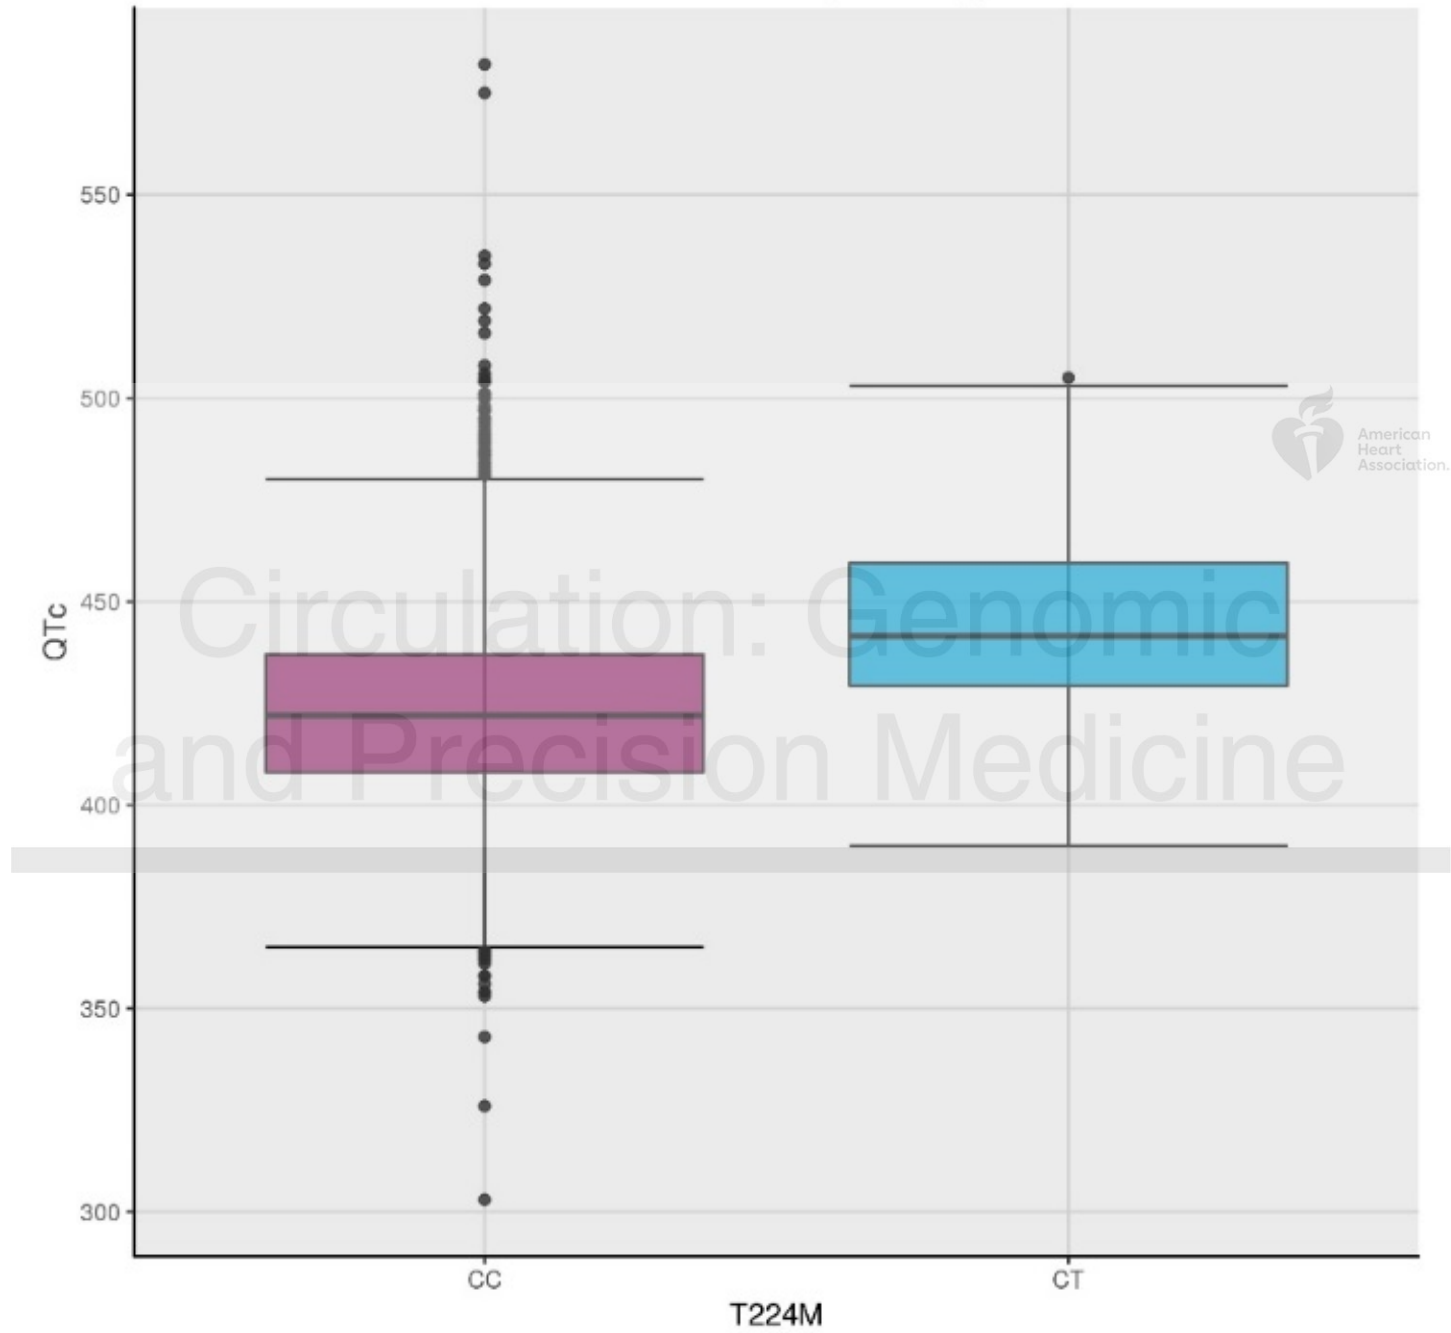

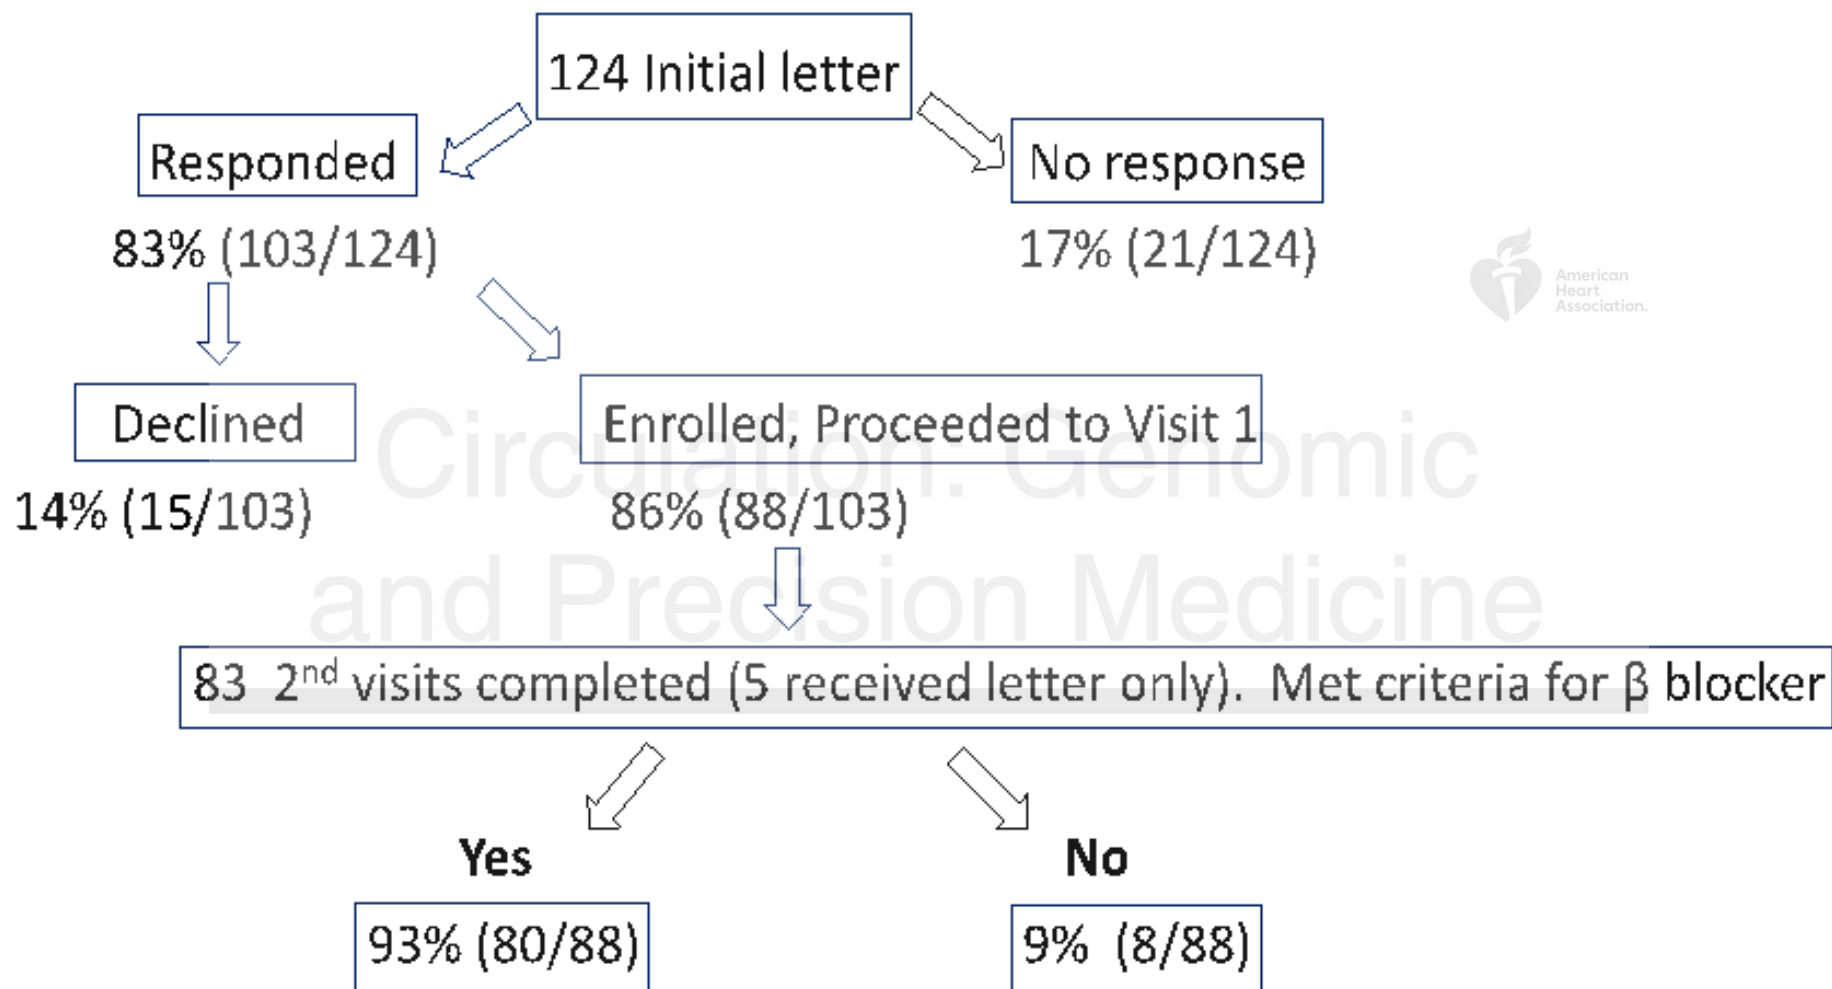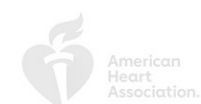

Circulation: Genomic  
and Precision Medicine

## SUPINE

## STANDING

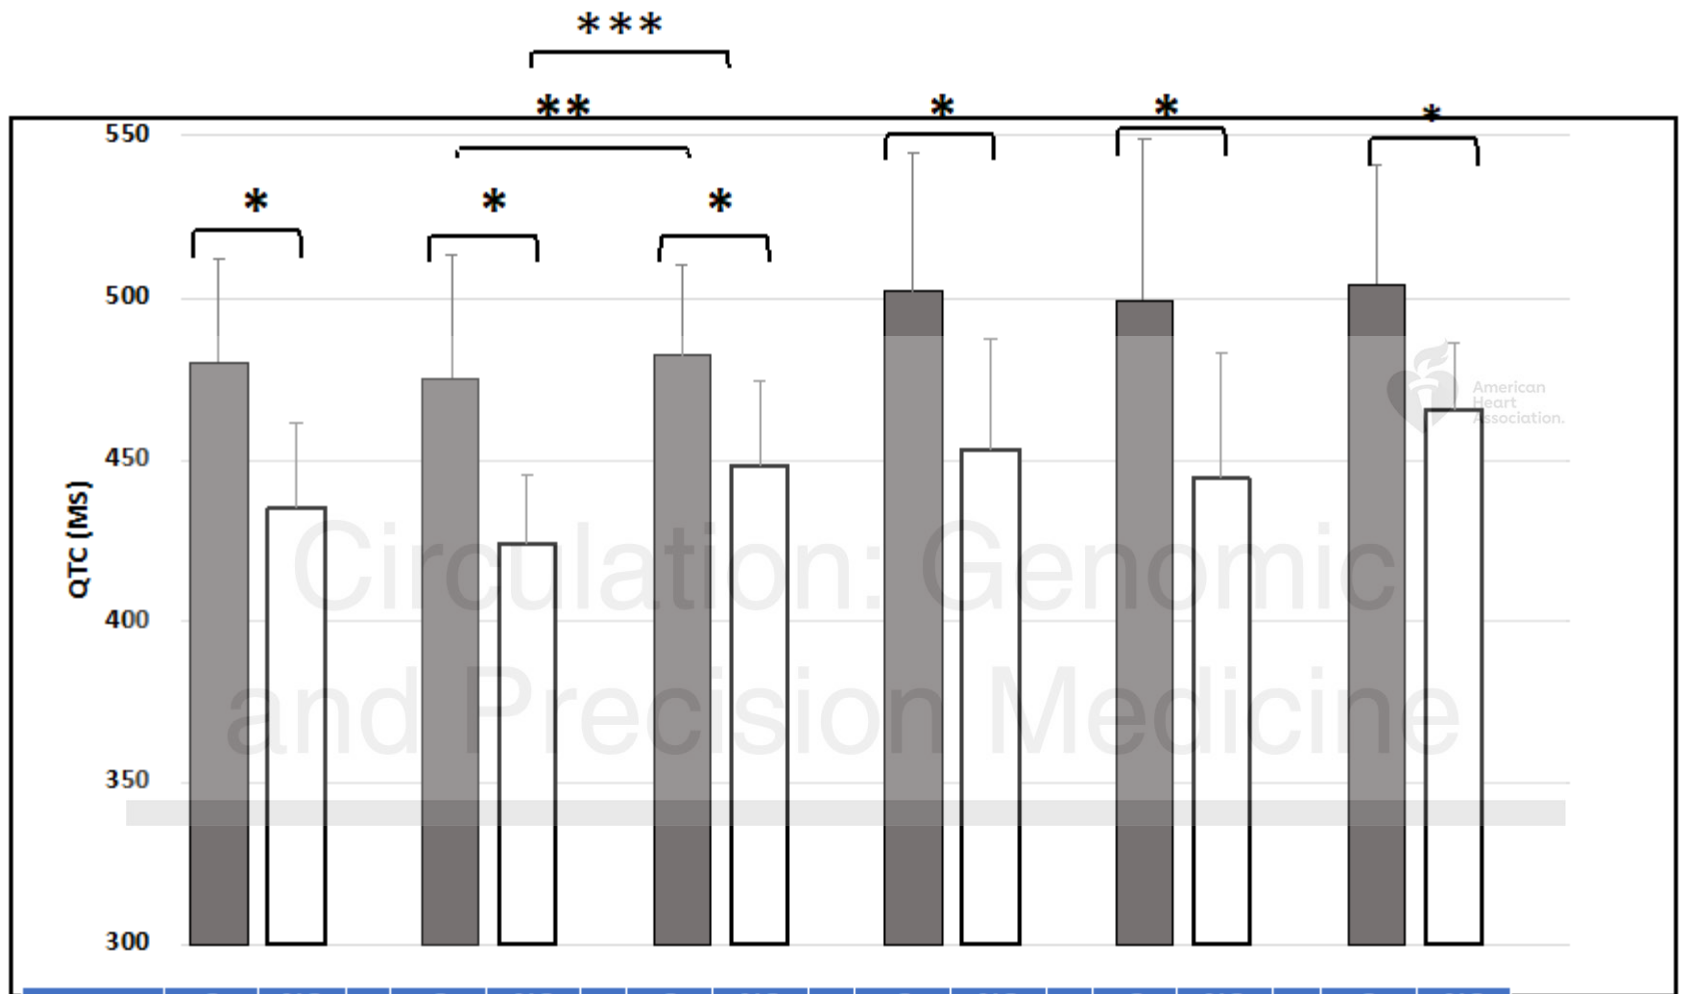

|     | C     | NC  | C   | NC  | C     | NC  | C     | NC  | C   | NC  | C     | NC  |
|-----|-------|-----|-----|-----|-------|-----|-------|-----|-----|-----|-------|-----|
|     | Total |     | Men |     | Women |     | Total |     | Men |     | Women |     |
| N   | 88    | 54  | 39  | 29  | 49    | 25  | 75    | 53  | 34  | 29  | 41    | 24  |
| QTc | 480   | 435 | 475 | 424 | 482   | 448 | 502   | 453 | 499 | 444 | 504   | 465 |
| SD  | 32    | 26  | 38  | 21  | 28    | 26  | 43    | 34  | 50  | 39  | 37    | 21  |

**Family 1**

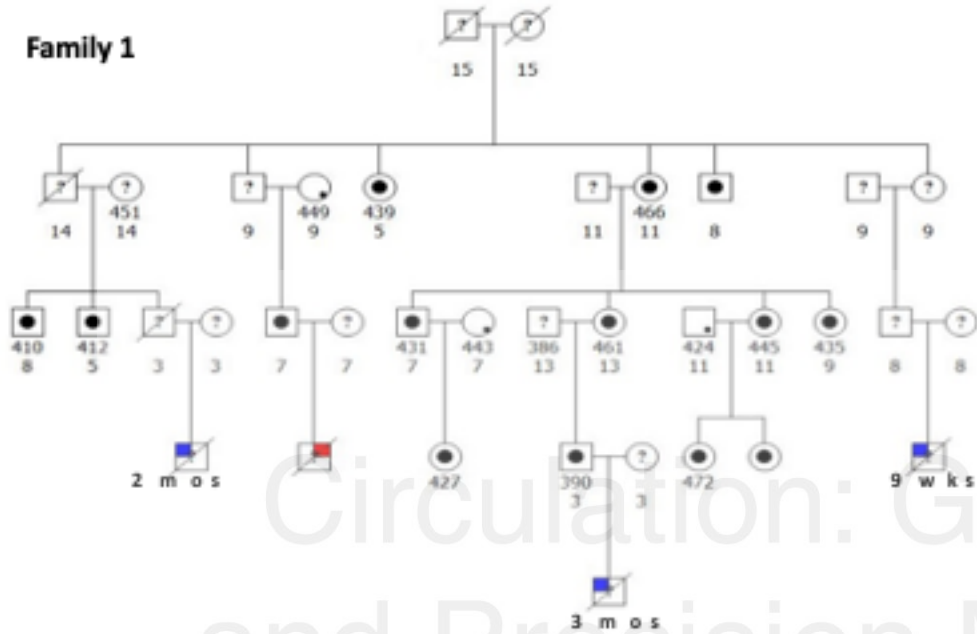

**Family 2**

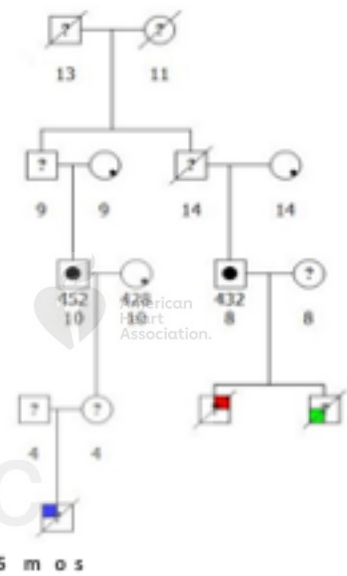

**Family 3**

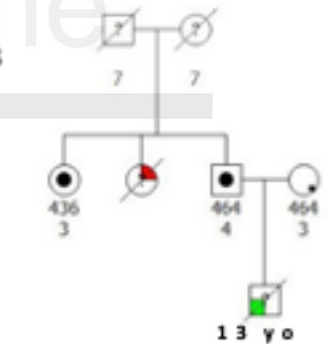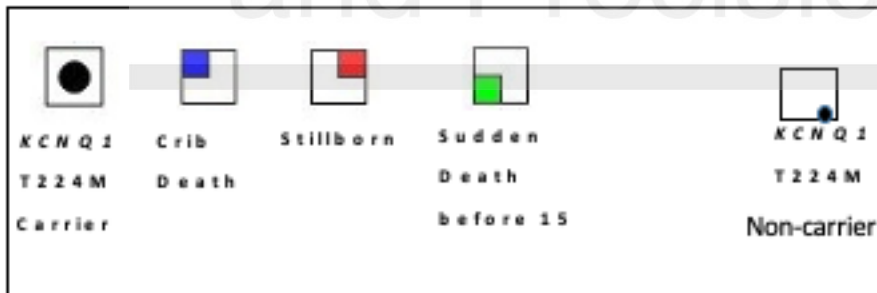

Number under each individual is Q Tc and # children

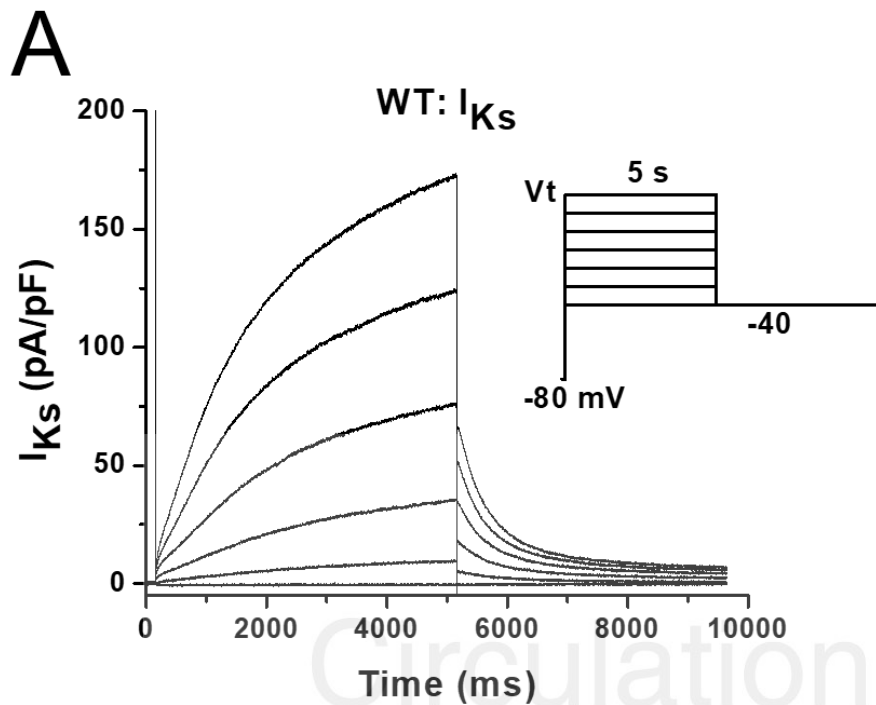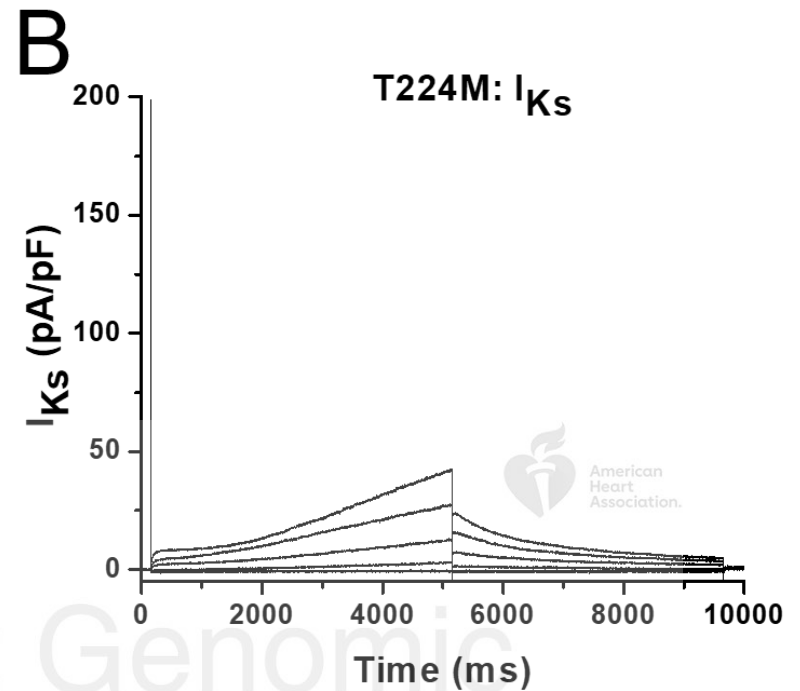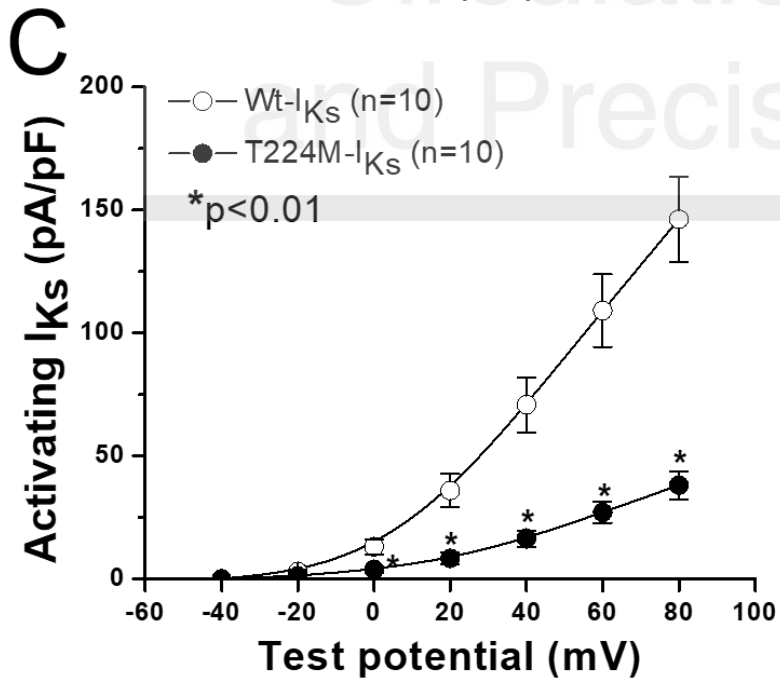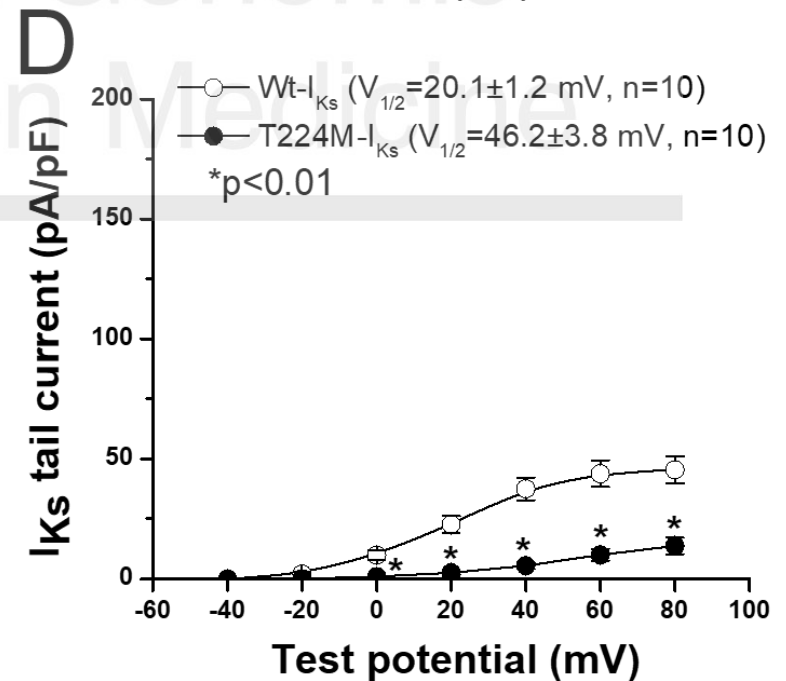

Supplement: hcg-13-e003133-s003.pdf [file hcg-13-e003133-s003.pdf]
